# Supplementary material
Source: publisher figshare collection journal article supplement (https://tandf.figshare.com/ndownloader/files/17808650)
Supplement: Supplementary file 1 [file 17808650]

Synthesis and Mesocrystalline Properties of Liquid Crystal Compounds withTetrathiafulvalene and Two Cyanobiphenyl units

**Supplementary Data**

Fuzhi Wei a,b, Li Wang a,b, Yan Xia a,b, Dongfeng Li a and Ruibin Hou a,b,*

a College of Chemistry and Life Science Changchun University of Technology, Changchun, China; b Advanced Institute of Materials Science b Changchun University of Technology, Changchun, China.


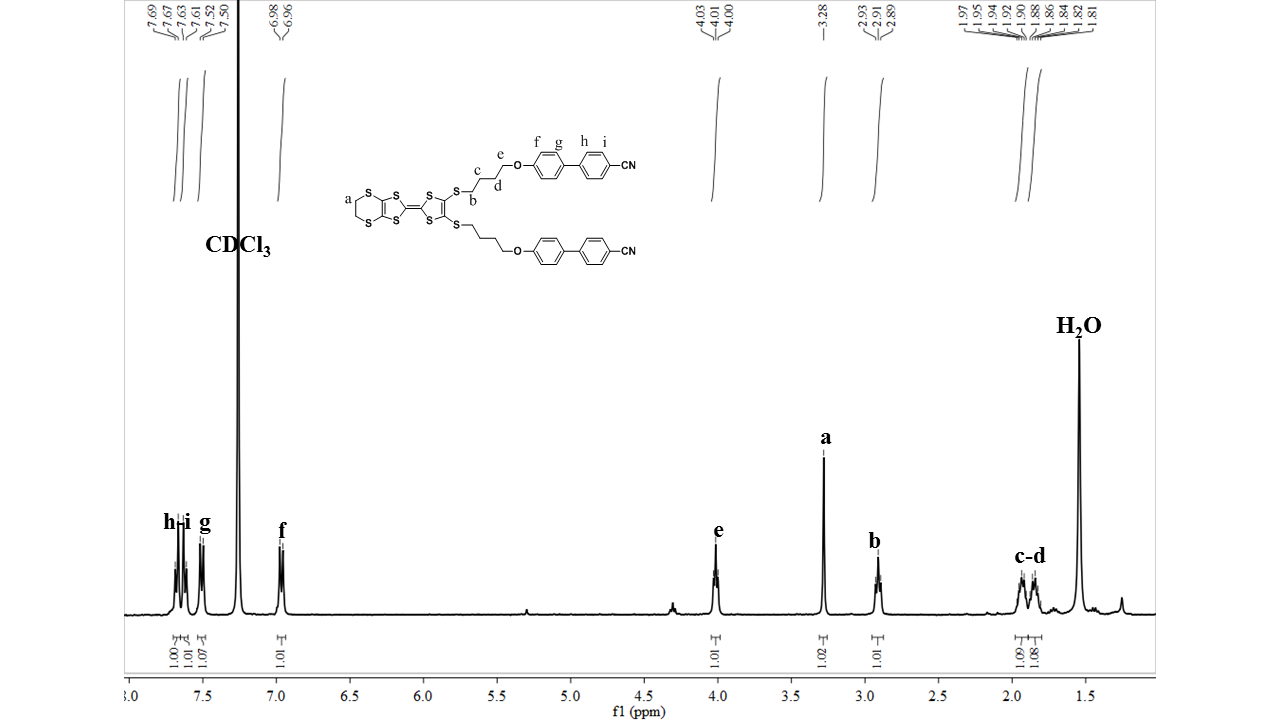


**Fig. S1.**  1H NMR of the target compound **3a**


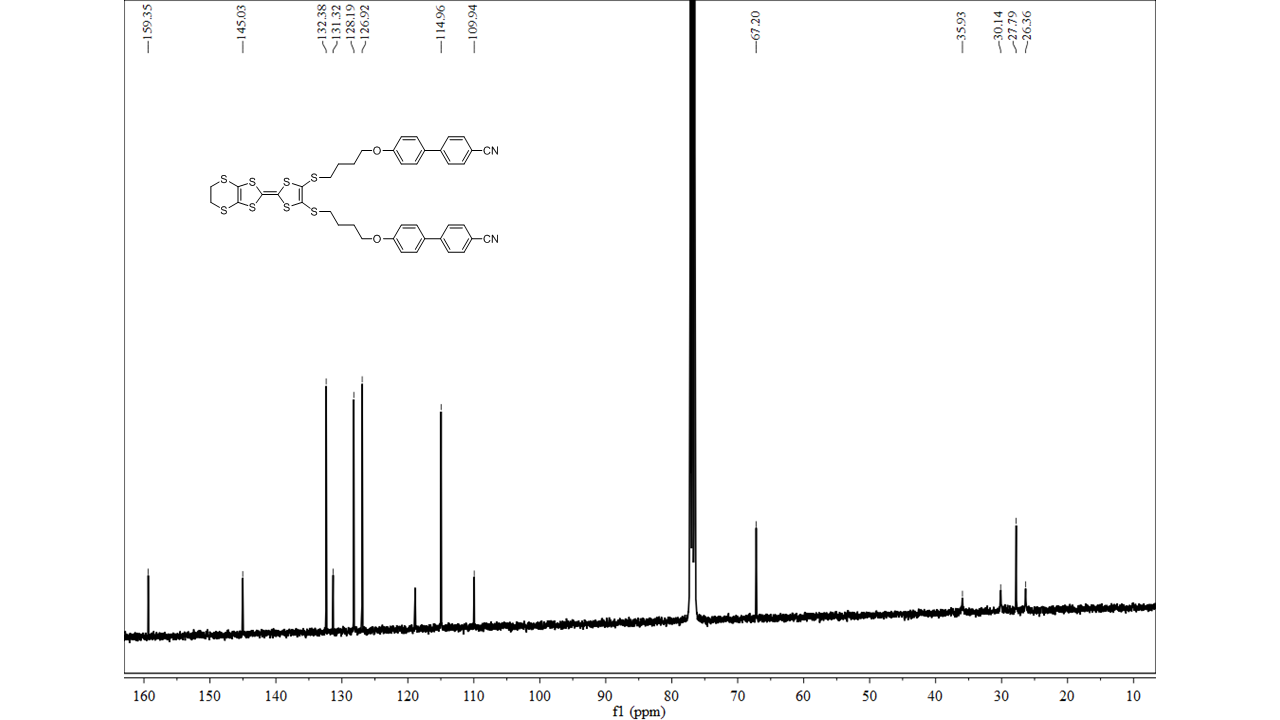


**Fig. S2** 13C NMR of the target compound **3a**

Fig. S3 FT-IR of the target compound **3a**


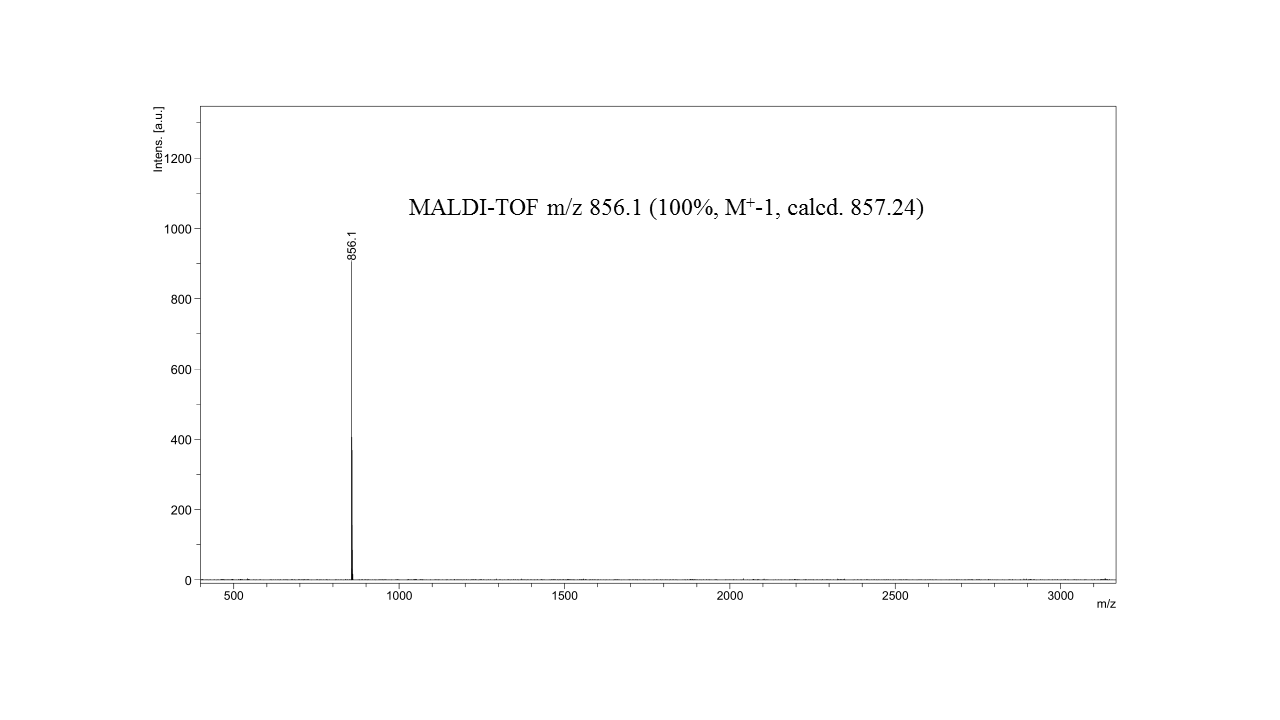


Fig. S4 MALDI-TOF-MS of the target compound **3a**


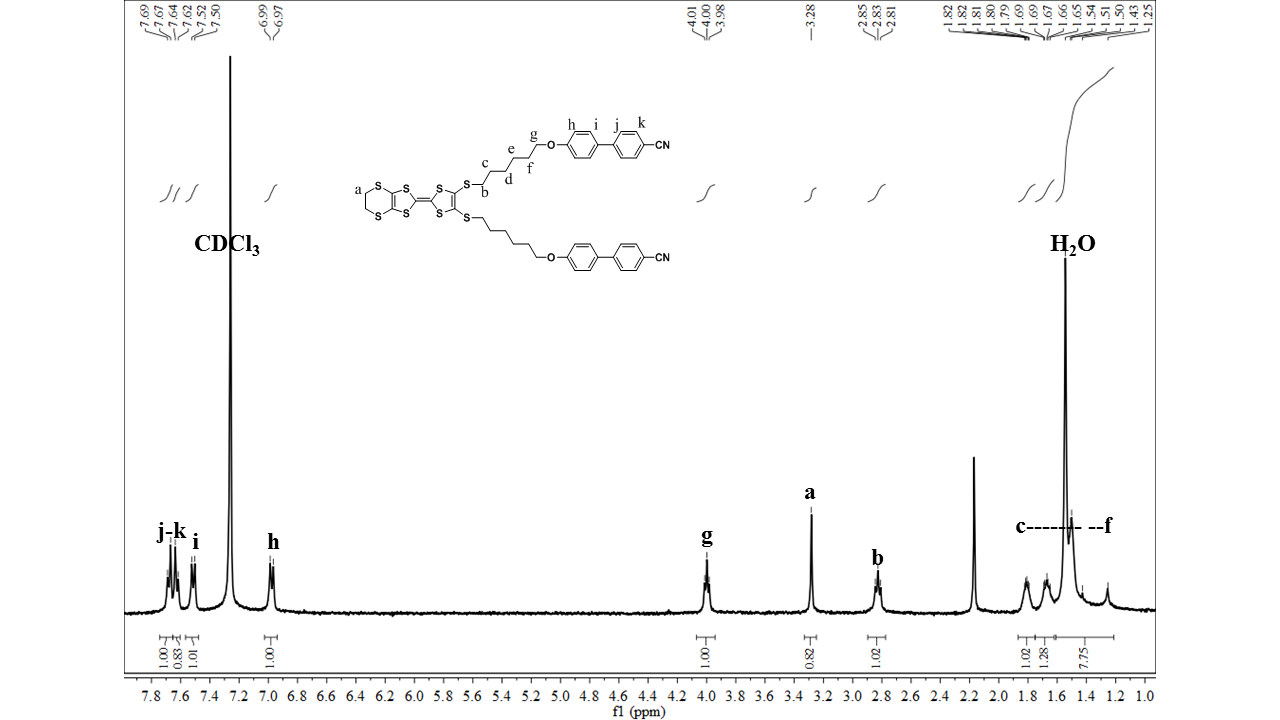


**Fig. S5** 1H NMR of the target compound **3b**


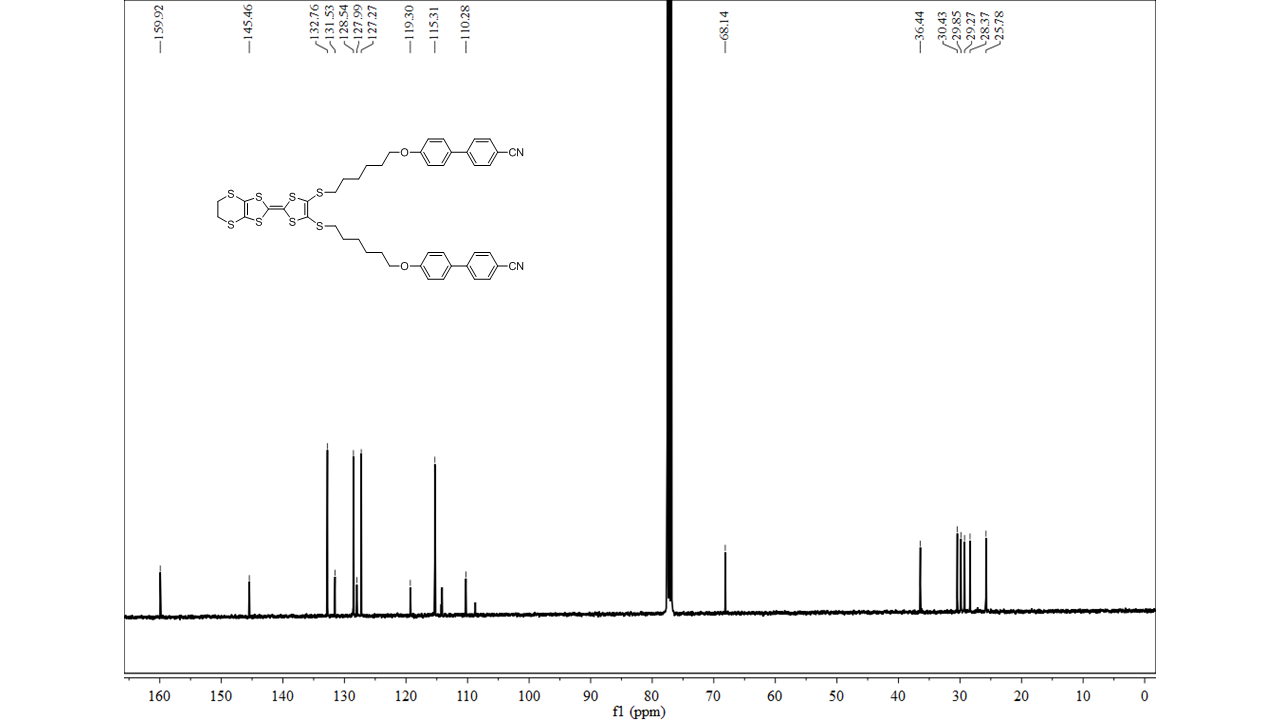


**Fig. S6**  13C NMR of the target compound **3b**

F**ig. S7** FT-IR of the target compound **3b**


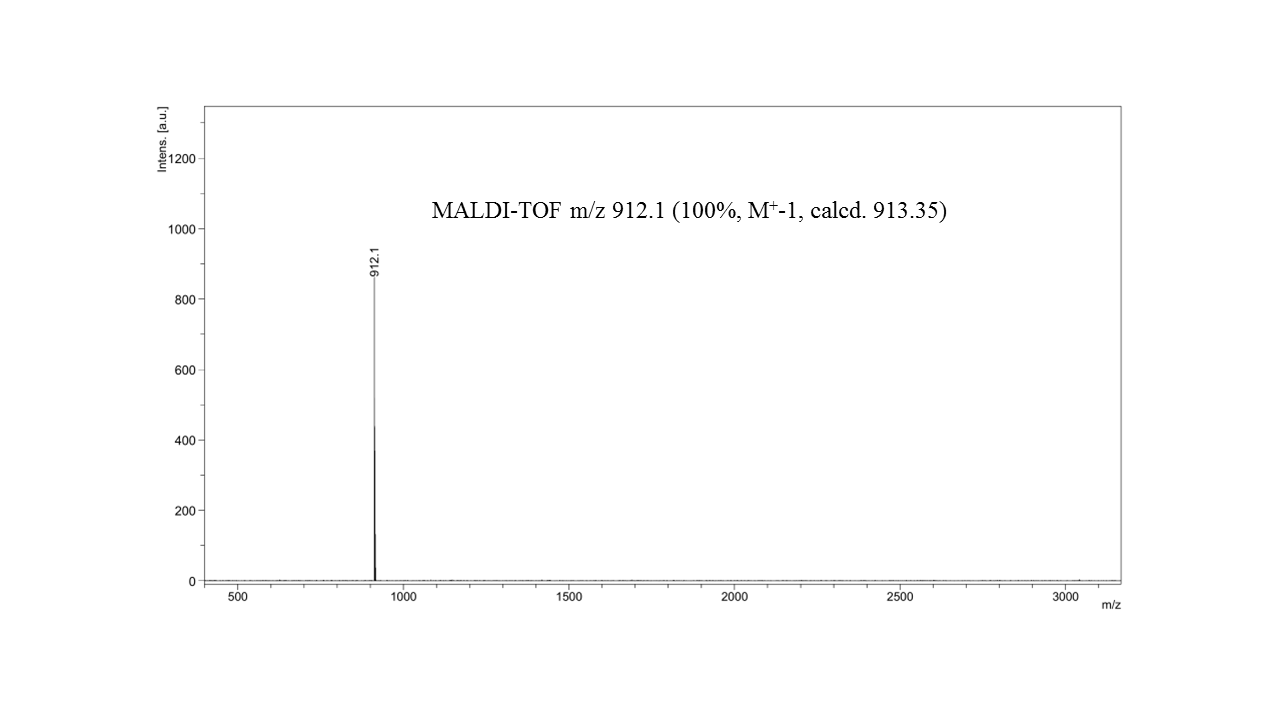


Fig. S8 MALDI-TOF-MS of the target compound **3b**


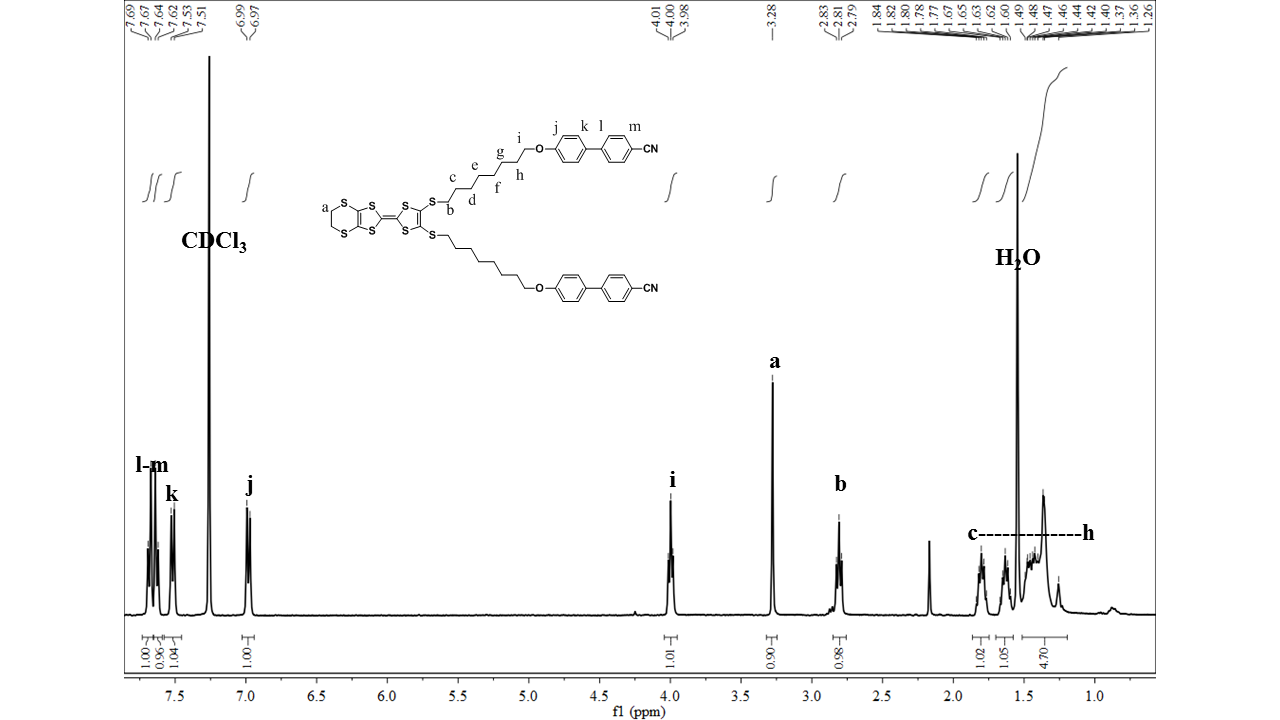


**Fig.** S9 1H NMR of the target compound **3c**


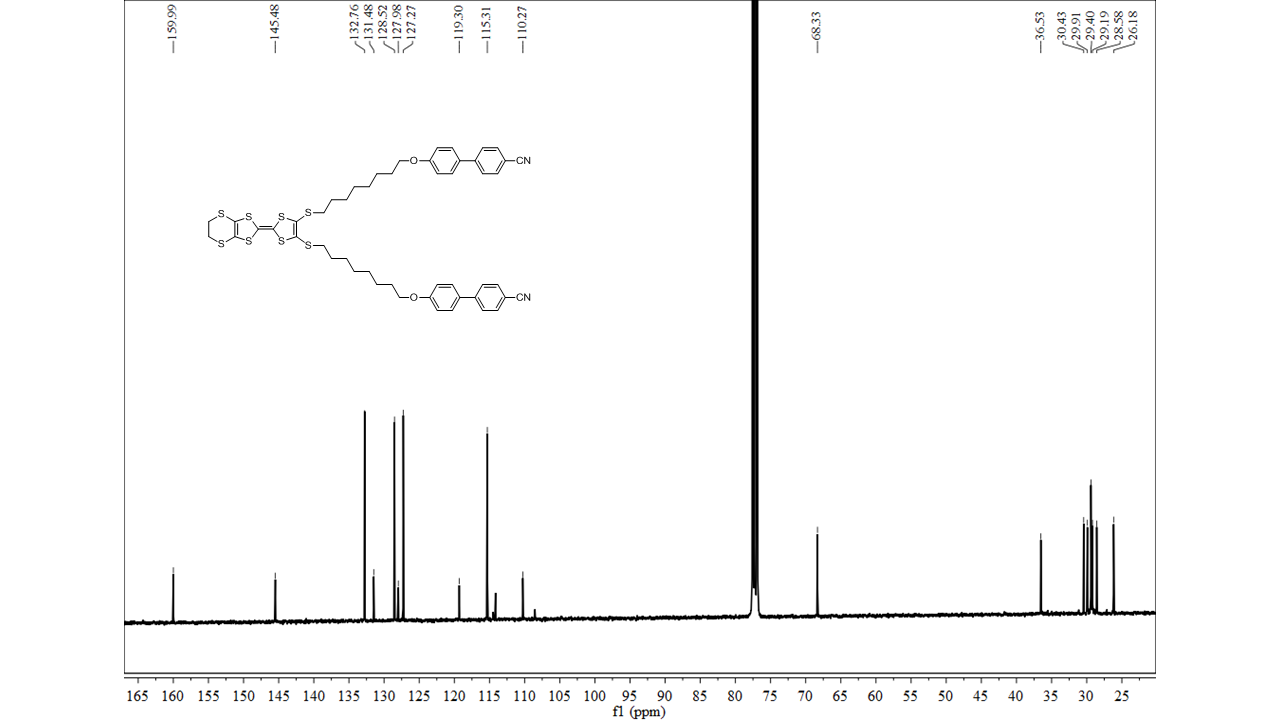


Fig. S10 13C NMR of the target compound **3c**

**Fig.** S11 FT-IR of the target compound **3c**


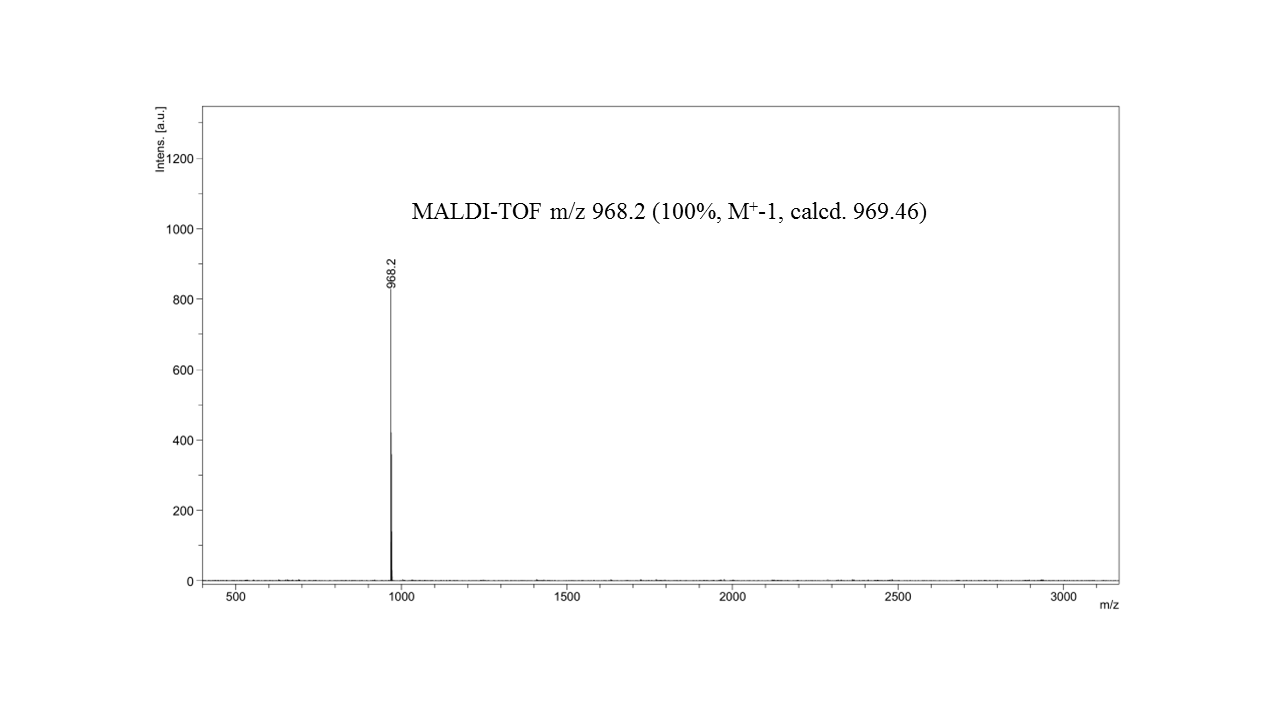


**Fig.** S12 MALDI-TOF-MS of the target compound **3c**


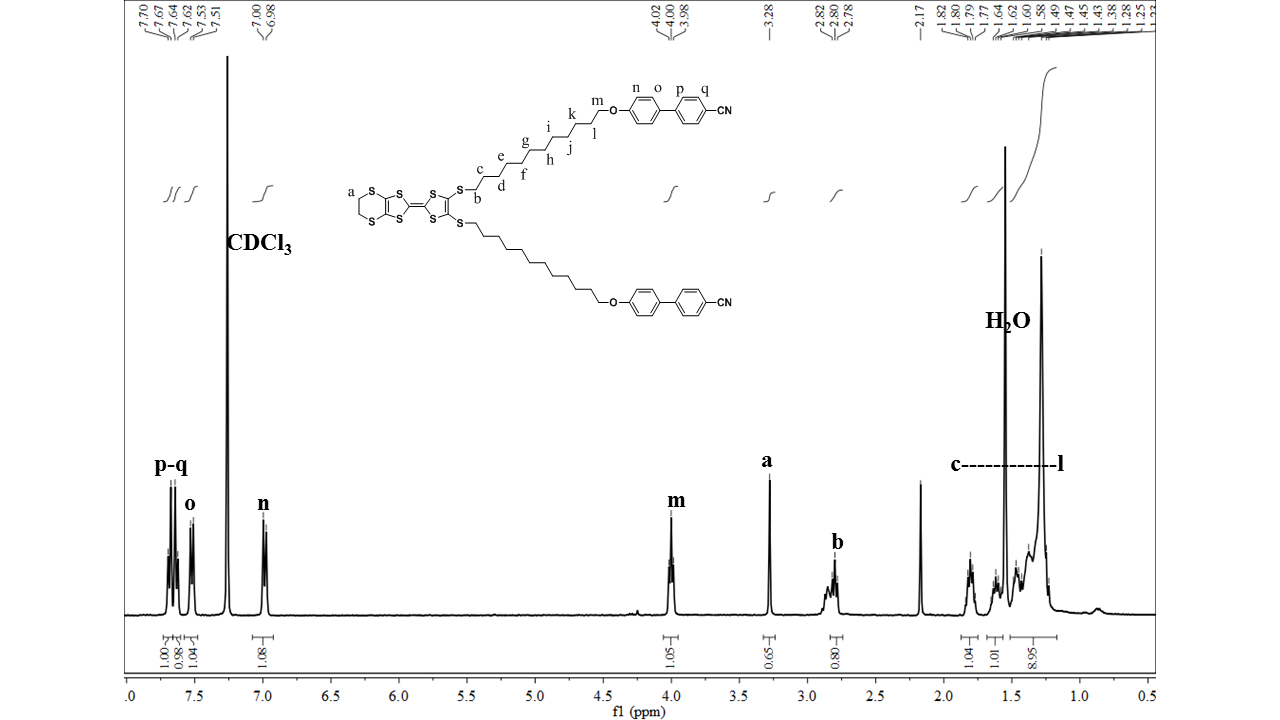


**Fig.** S13 1H NMR of the target compound **3d**


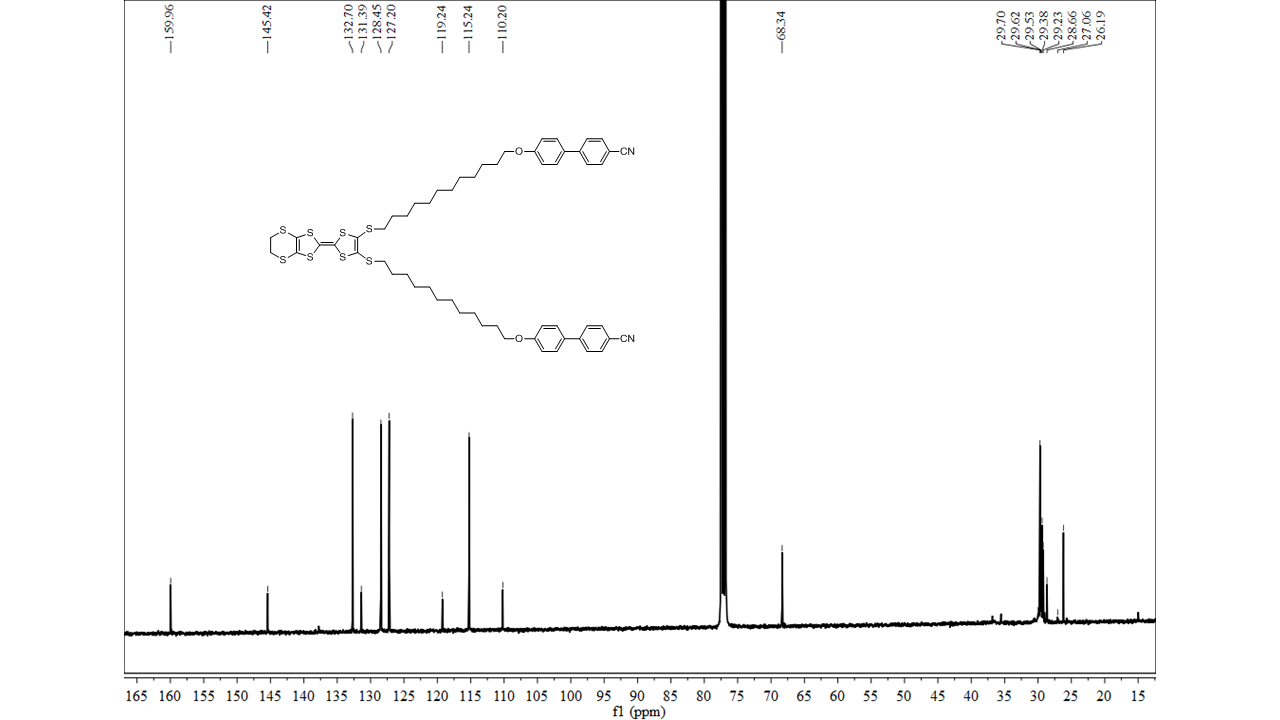


**Fig.** S14 13C NMR of the target compound **3d**

**Fig.** S15 FT-IR of the target compound **3d**


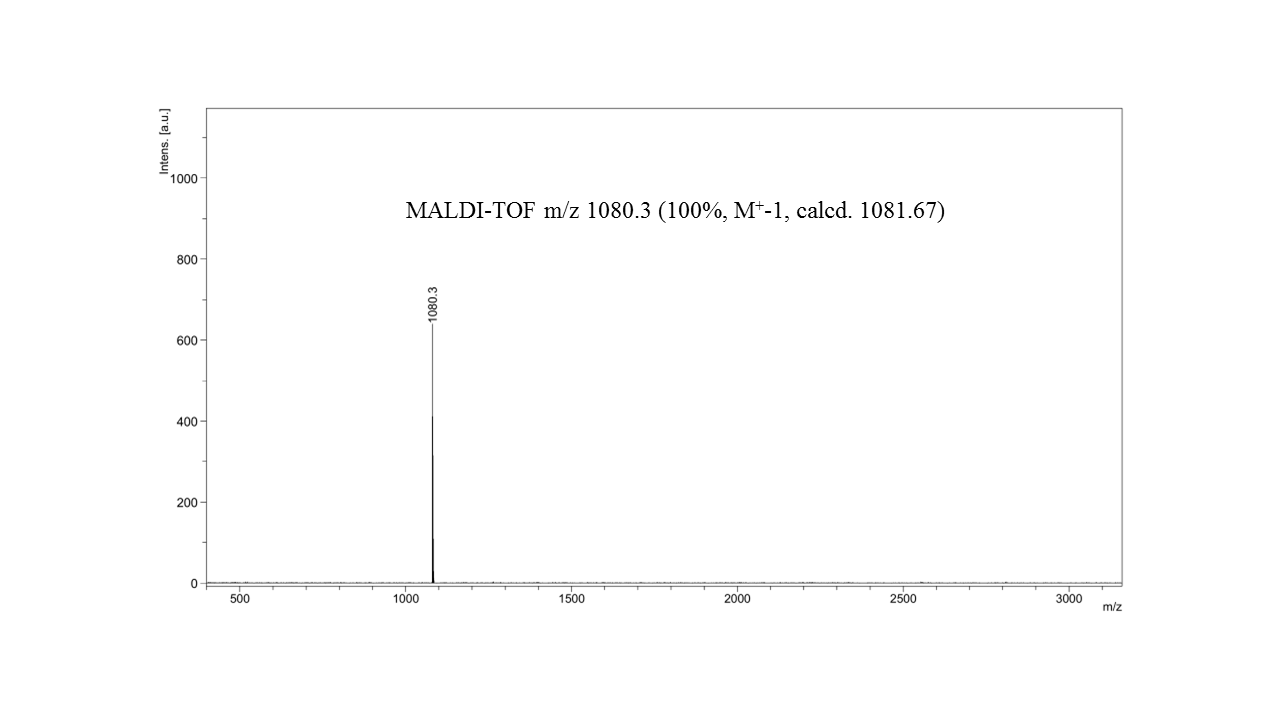


**Fig.** S16 MALDI-TOF-MS of the target compound **3d**

**
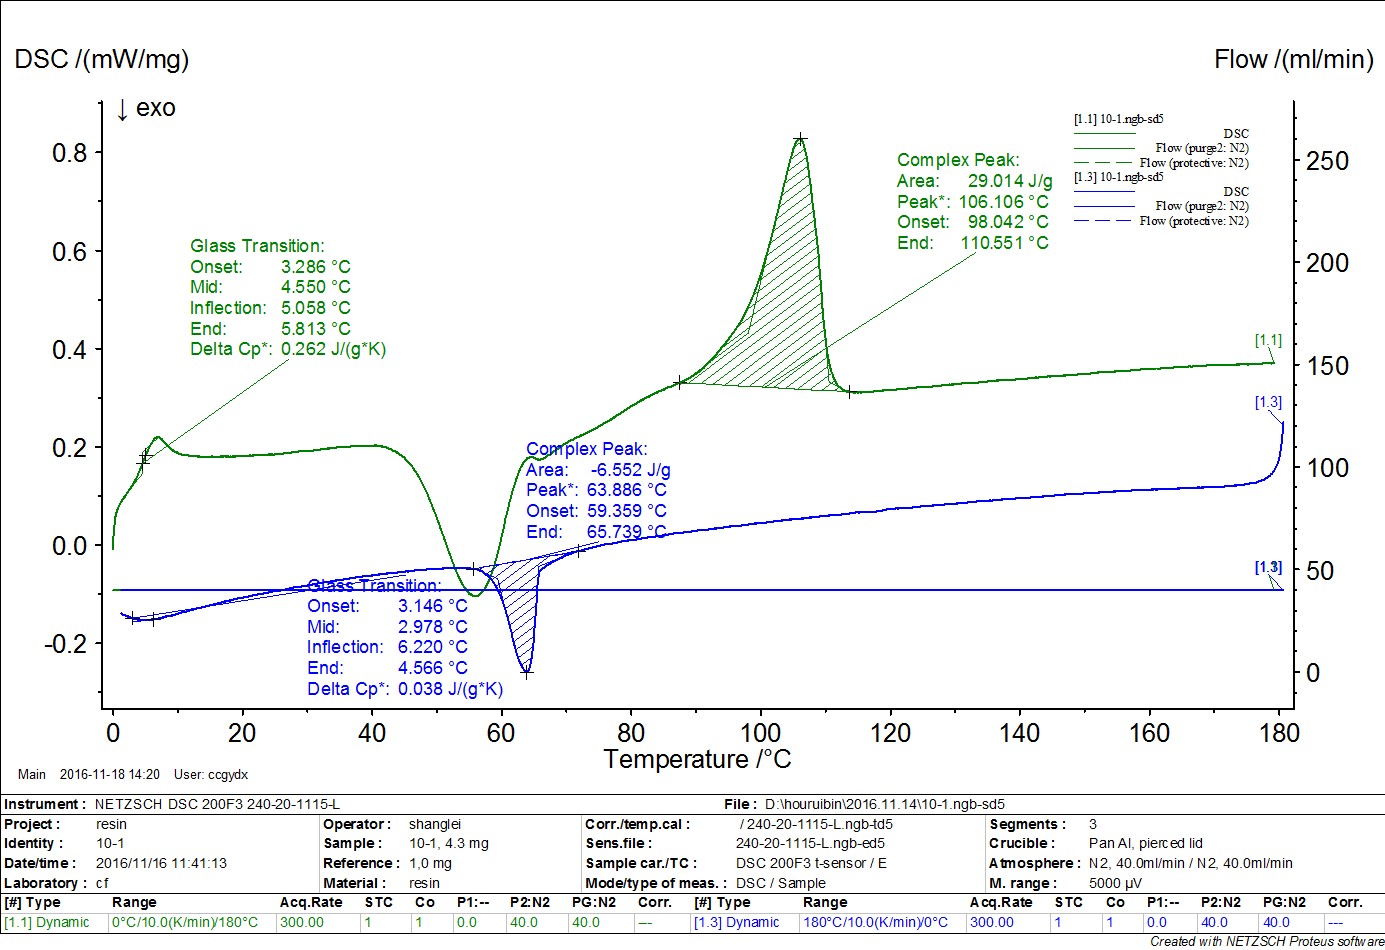
**

**Fig. S17**. DSC curve of the target compound **3d**.

**Fig. S18.** X-ray diffraction patterns of **3d** plotted against q = 4πsinθ/λmeasured at 40 °C.
